# Supplementary material
Source: PubMed Central journal article supplement (PMC1894998)

**Table S1: Multivariate analysis on major transplantation endpoints**

| Covariates                           | Disease-Free Survival  |         | Overall Survival       |         | Relapse                |         |
|--------------------------------------|------------------------|---------|------------------------|---------|------------------------|---------|
|                                      | Hazard Ratio (95% CI)* | p-value | Hazard Ratio (95% CI)* | p-value | Hazard Ratio (95% CI)* | p-value |
| Missing KIR Ligand                   | 0.61 (0.35-1.06)       | 0.08    | 0.63 (0.34-1.16)       | 0.14    | 0.16 (0.06-0.47)       | <0.001  |
| Age of Recipient                     | 1.84 (0.56-6.05)       | 0.32    | 2.08 (0.49-8.89)       | 0.32    | 0.59 (0.13-2.69)       | 0.5     |
| Time from Diagnosis                  | 3.23 (1.49-6.98)       | 0.003   | 5.61 (2.29-13.77)      | <0.001  | 0.91 (0.07-12.08)      | 0.94    |
| CMV**                                | 0.67 (0.38-1.16)       | 0.15    | 0.94 (0.51-1.73)       | 0.84    | 1.35 (0.57-3.16)       | 0.49    |
| GvHD                                 | 0.55 (0.27-1.14)       | 0.11    | 0.81 (0.39-1.68)       | 0.56    | 0.20 (0.04-0.97)       | 0.05    |
| Total nucleated cell count           | 0.58 (0.34-0.95)       | 0.031   | 0.38 (0.21-0.70)       | 0.002   | 0.87 (0.32-2.41)       | 0.79    |
| T-cell depletion method <sup>#</sup> | 0.99 (0.50-1.98)       | 0.97    | 1.04 (0.48-2.30)       | 0.91    | 0.35 (0.06-1.94)       | 0.23    |

\*CI denotes confidence interval

\*\*donor-recipient CMV seronegative/seronegative versus other

<sup>#</sup>Year of transplant was strongly associated with T-cell depletion method.

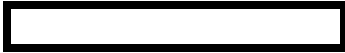

Supplement: blood_2004-12-4825_1.pdf [file blood_2004-12-4825_1.pdf]
